# Supplementary material for: Which individuals are at increased risk of pneumococcal disease and why? Impact of COPD, asthma, smoking, diabetes, and/or chronic heart disease on community-acquired pneumonia and invasive pneumococcal disease
Source: PubMed Central journal article supplement — Thorax. 2015 Jul 28;70(10):984–9. doi: 10.1136/thoraxjnl-2015-206780 (PMC4602259; doi:10.1136/thoraxjnl-2015-206780), 2015-07-28
Supplement: thoraxjnl-2015-206780-s1.pdf [file thoraxjnl-2015-206780-s1.pdf]

**Supplemental table S1 Risk of community-acquired pneumonia or pneumococcal disease in patients with chronic respiratory diseases (CRD)**

| Reference (country)                             | Methodology (N)                                                                                                                                        | Disease definition                                               | Underlying definition                       | No. of exposed cases with CRD | Population age (years) (other predisposing condition) | Fold risk elevation OR (95% CI)*                                                  |
|-------------------------------------------------|--------------------------------------------------------------------------------------------------------------------------------------------------------|------------------------------------------------------------------|---------------------------------------------|-------------------------------|-------------------------------------------------------|-----------------------------------------------------------------------------------|
| <b>Community-acquired pneumonia (all cause)</b> |                                                                                                                                                        |                                                                  |                                             |                               |                                                       |                                                                                   |
| Almirall 2008 [16] (Spain)                      | Population-based, case-control study, Nov 1999–Nov 2000 (1,336 cases)                                                                                  | Antibiotics, clinical and X-ray                                  | Chronic bronchitis                          | 216                           | >14                                                   | Multivariate: 1.81 (1.19–2.75)                                                    |
|                                                 |                                                                                                                                                        |                                                                  | Asthma                                      | 375                           | >14                                                   | Multivariate: 1.67 (1.28–2.19)                                                    |
| Garcia-Vidal 2009 [17] (Spain)                  | Prospective, observational study, Jan 1995–Dec 2005 (146 cases, 224 episodes)                                                                          | Clinical, X-ray, blood culture, urinary tests                    | COPD                                        | 56                            | Adults                                                | Multivariate: 1.53 (1.02–2.30)                                                    |
|                                                 | Recurrent community-acquired pneumonia: new episode of community-acquired pneumonia requiring hospitalization <1 month or >3 years after first episode |                                                                  |                                             |                               |                                                       |                                                                                   |
| Gau 2010 [18] (USA)                             | Retrospective case-control study, 2004–2006 (194 cases)                                                                                                | X-ray                                                            | COPD                                        | 91                            | ≥65                                                   | Adjusted: 1.82 (1.17–2.82)                                                        |
| Jackson 2009 [19] (USA)                         | Population-based, nested case-control study, influenza seasons and pre-influenza periods of 2000/01 and 2002/03 (1,173 cases)                          | Clinical and X-ray                                               | Lung disease, no medication or oxygen       | 6                             | ≥65<br>65–74<br>75–84<br>85                           | Multivariate:<br>2.0 (1.5–2.7)<br>3.1 (1.7–5.7)<br>2.3 (1.5–3.5)<br>1.1 (0.5–2.3) |
|                                                 |                                                                                                                                                        |                                                                  | Lung disease with medication but not oxygen | 36                            | ≥65<br>65–74<br>75–84<br>85                           | 2.5 (2.2–3.0)<br>2.9 (2.3–3.7)<br>2.8 (2.2–3.6)<br>1.9 (1.3–2.8)                  |
|                                                 |                                                                                                                                                        |                                                                  | Lung disease, using oxygen                  | 9                             | ≥65<br>65–74<br>75–84<br>85                           | 8.3 (5.5–12.7)<br>8.3 (4.4–15.7)<br>5.2 (2.7–9.9)<br>16.1 (3.7–69.9)              |
|                                                 |                                                                                                                                                        |                                                                  |                                             |                               |                                                       |                                                                                   |
| Juthani-Mehta 2013 [15] (USA)                   | Case-control study using a subset of a prospective cohort, 1997–2008 (193 cases)                                                                       | Hospitalized pneumonia: ICD-9 criteria, clinical and chest X-ray | Chronic lung disease                        | 49                            | 70–79                                                 | Bivariate HR: 1.20 (0.87–1.66)                                                    |

| Reference (country)             | Methodology (N)                                                                                                | Disease definition                                                                 | Underlying definition                      | No. of exposed cases with CRD | Population age (years) (other predisposing condition) | Fold risk elevation OR (95% CI)*                         |
|---------------------------------|----------------------------------------------------------------------------------------------------------------|------------------------------------------------------------------------------------|--------------------------------------------|-------------------------------|-------------------------------------------------------|----------------------------------------------------------|
| Loeb 2009 [20] (Canada)         | Population-based, case-control study with collection of personal interview data, Sep 2002–Apr 2005 (717 cases) | Clinical and X-ray                                                                 | COPD                                       | 343                           | ≥65                                                   | Adjusted: 13.53 (7.80–23.48)                             |
|                                 |                                                                                                                |                                                                                    | Asthma                                     | 168                           | ≥65                                                   | 3.04 (2.28–4.05)                                         |
| Mullerova 2012 [21] (UK)        | Nested case-control population-based on retrospective COPD cohort, 1996–2005 (1,469 cases)                     | Diagnosis code                                                                     | COPD hospitalization (severe exacerbation) |                               | ≥45 (COPD)                                            | Multivariate: 2.73 (2.32–3.20)                           |
|                                 |                                                                                                                |                                                                                    | Moderate COPD exacerbation                 |                               | ≥45 (COPD)                                            | 1.28 (1.13–1.46)                                         |
| Obiora 2013 [22] (UK)           | Nested case-control study using primary care patient database, 2001–2002 (4,964 cases)                         | Medical records                                                                    | Lung disease                               | 1,201                         | Adults                                                | 2.74 (2.54–2.96)                                         |
| Rodriguez 2009 [23] (Sweden)    | Nested case-control study using the Health Improvement Network database, 2000–2005 (7,297 cases)               | Pneumonia diagnosis code, validated by manual review of medical records            | COPD                                       | 1,144                         | 20–79                                                 | RR: 2.82 (2.45–3.24)                                     |
|                                 |                                                                                                                |                                                                                    | Asthma                                     | 1,807                         | 20–79                                                 | RR: 1.58 (1.44–1.74)                                     |
| Shea 2014 [7] (USA)             | Retrospective cohort study using three healthcare claims repositories, 2006–2010                               | Diagnosis/drug codes                                                               | Chronic lung disease                       |                               | 18–49                                                 | Rate ratio: 8.6 (8.4–8.7)                                |
|                                 |                                                                                                                |                                                                                    |                                            |                               | 50–64                                                 | Rate ratio: 8.6 (8.5–8.7)                                |
|                                 |                                                                                                                |                                                                                    |                                            | ≥65                           | Rate ratio: 6.6 (6.6–6.7)                             |                                                          |
|                                 |                                                                                                                |                                                                                    | Asthma                                     | 18–49                         | Rate ratio: 3.8 (3.8–3.9)                             |                                                          |
| 50–64                           | Rate ratio: 4.7 (4.6–4.7)                                                                                      |                                                                                    |                                            |                               |                                                       |                                                          |
|                                 | ≥65                                                                                                            | Rate ratio: 4.6 (4.5–4.6)                                                          |                                            |                               |                                                       |                                                          |
| Vila-Corcoles 2009 [24] (Spain) | Population-based cohort study in community-dwelling individuals, 2002–2005 (473 cases)                         | Clinical, X-ray, microbiological and diagnosis code in hospital discharge database | Chronic lung disease                       | 171                           | ≥65                                                   | Multivariate HR: 2.91 (2.35–3.61)                        |
| Vinogradova 2009 [8] (UK)       | Nested case-control study in 443 general practices in the UK 1996–2005 (17,172 cases)                          | Incident diagnosis code                                                            | Chronic respiratory disease                | 4,468<br>1,493                | All ages<br>5–64                                      | Adjusted: 2.42 (2.31–2.53)<br>Adjusted: 2.31 (2.15–2.48) |

| Reference (country)                  | Methodology (N)                                                                                                                                                             | Disease definition                                 | Underlying definition       | No. of exposed cases with CRD | Population age (years) (other predisposing condition) | Fold risk elevation OR (95% CI)*  |
|--------------------------------------|-----------------------------------------------------------------------------------------------------------------------------------------------------------------------------|----------------------------------------------------|-----------------------------|-------------------------------|-------------------------------------------------------|-----------------------------------|
| <b>Pneumococcal pneumonia</b>        |                                                                                                                                                                             |                                                    |                             |                               |                                                       |                                   |
| Shea 2014 [7] (USA)                  | Retrospective cohort study using three healthcare claims repositories, 2006–2010                                                                                            | Diagnosis/drug codes                               | Chronic lung disease        |                               | 18–49                                                 | Rate ratio: 8.9 (8.1–9.7)         |
|                                      |                                                                                                                                                                             |                                                    |                             |                               | 50–64                                                 | Rate ratio: 9.8 (9.3–10.3)        |
|                                      |                                                                                                                                                                             |                                                    |                             |                               | ≥65                                                   | Rate ratio: 7.7 (7.3–8.0)         |
|                                      |                                                                                                                                                                             |                                                    | Asthma                      |                               | 18–49                                                 | Rate ratio: 3.7 (3.4–4.0)         |
|                                      |                                                                                                                                                                             |                                                    |                             |                               | 50–64                                                 | Rate ratio: 4.9 (4.6–5.2)         |
|                                      |                                                                                                                                                                             |                                                    |                             |                               | ≥65                                                   | Rate ratio: 5.9 (5.6–6.3)         |
| <b>Invasive pneumococcal disease</b> |                                                                                                                                                                             |                                                    |                             |                               |                                                       |                                   |
| Flory 2009 [25] (USA)                | Population-based surveillance study, 2002–2004 (609 cases)                                                                                                                  | Bacteremia pneumococcal pneumonia: microbiological | Asthma                      | 71                            | ≥18                                                   | Adjusted: 2.1 (1.5–2.9)           |
| Inghammar 2013 [13] (Sweden)         | Nested case-control study, 1987–2008 (4,084 cases)                                                                                                                          | Positive culture from a normally sterile fluid     | COPD                        | 248                           | ≥18                                                   | Adjusted: 4.7 (4.0–5.6)           |
|                                      |                                                                                                                                                                             |                                                    |                             | 25                            | 18–59                                                 | 10.3 (5.8–18.0)                   |
|                                      |                                                                                                                                                                             |                                                    |                             | 147                           | 60–79                                                 | 6.3 (5.1–7.8)                     |
|                                      |                                                                                                                                                                             |                                                    | Asthma                      | 76                            | ≥80                                                   | 4.0 (3.0–4.8)                     |
|                                      |                                                                                                                                                                             |                                                    |                             | 71                            | ≥18                                                   | Adjusted: 2.0 (1.5–2.6)           |
|                                      |                                                                                                                                                                             |                                                    |                             | 26                            | 18–59                                                 | 4.9 (3.0–7.8)                     |
| Shea 2014 [7] (USA)                  | Retrospective cohort study using three healthcare claims repositories, 2006–2010                                                                                            | Diagnosis/drug codes                               | Chronic lung disease        |                               | 18–49                                                 | Rate ratio: 6.3 (4.7–8.5)         |
|                                      |                                                                                                                                                                             |                                                    |                             |                               | 50–64                                                 | Rate ratio: 7.7 (6.8–8.8)         |
|                                      |                                                                                                                                                                             |                                                    |                             |                               | ≥65                                                   | Rate ratio: 6.2 (5.4–7.0)         |
|                                      |                                                                                                                                                                             |                                                    | Asthma                      |                               | 18–49                                                 | Rate ratio: 2.5 (1.9–3.2)         |
|                                      |                                                                                                                                                                             |                                                    |                             |                               | 50–64                                                 | Rate ratio: 3.8 (3.2–4.5)         |
|                                      |                                                                                                                                                                             |                                                    |                             |                               | ≥65                                                   | Rate ratio: 4.1 (3.4–5.0)         |
| van Hoek 2012 [12] (UK)              | Comparison of prevalence of clinical risk factors in the general population with that in hospitalized patients with invasive pneumococcal disease. 2002–2009 (22,298 cases) | ICD diagnosis code; microbiological                | Chronic respiratory disease | 938<br>2,364                  | 16–64<br>≥65                                          | 16.8 (15.7–18.0)<br>5.1 (4.8–5.4) |
| Watt 2007 [26] (USA)                 | Case-control prospective study, population-based active laboratory surveillance, 1999–2002 (118 cases)                                                                      | Positive culture from a normally sterile fluid     | COPD                        | 7                             | ≥18                                                   | Univariate: 4.6 (1.3–15.9)        |
|                                      |                                                                                                                                                                             |                                                    | Asthma                      | 8                             | ≥18                                                   | Univariate: 1.3 (0.6–2.9)         |

Grey rows represent cohort studies; white rows represent case-control studies. \*Unless otherwise specified.

CI, confidence interval; CRD, chronic respiratory disease; COPD, chronic obstructive pulmonary disease; HR, hazard ratio; ICD, International Classification of Diseases; OR, odds ratio, RR: relative risk.

**Supplemental table S2 Risk of community-acquired pneumonia or pneumococcal disease in individuals who smoke**

| Reference (country)                 | Methodology (N)                                                                                                               | Disease definition              | Underlying definition                         | Number of smokers | Population age (years) (other predisposing condition)      | Fold risk elevation OR (95% CI)*                                                                                                                                       |
|-------------------------------------|-------------------------------------------------------------------------------------------------------------------------------|---------------------------------|-----------------------------------------------|-------------------|------------------------------------------------------------|------------------------------------------------------------------------------------------------------------------------------------------------------------------------|
| <b>Community-acquired pneumonia</b> |                                                                                                                               |                                 |                                               |                   |                                                            |                                                                                                                                                                        |
| Almirall 2014 [29] (Spain)          | Population-based case-control study (471 cases)                                                                               | Clinical, X-ray, antibiotics    | Passive smoker                                |                   | >14<br><65<br>≥65                                          | Adjusted:<br>1.18 (0.90–1.57)<br>0.98 (0.68–1.41)<br>1.56 (1.00–2.45)                                                                                                  |
| Almirall 2008 [16] (Spain)          | Population-based, case-control study, Nov 1999–Nov 2000 (1,336 cases)                                                         | Antibiotics, clinical and X-ray | Ex-smoker<br>Current smoker<br>Passive smoker | 423<br>365<br>143 | >14<br>>14<br>>14                                          | Univariate:<br>1.37 (1.14–1.64)<br>1.34 (1.11–1.62)<br>1.22 (0.93–1.61)                                                                                                |
|                                     |                                                                                                                               |                                 | Pack-yrs: ≤150<br>Pack-yrs: >150              | 354<br>362        | >14<br>>14                                                 | Multivariate:<br>1.01 (0.81–1.26)<br>1.46 (1.14–1.86)                                                                                                                  |
| Gau 2010 [18] (USA)                 | Retrospective case-control study, 2004–2006 (194 cases)                                                                       | X-ray                           | Ex-smoker<br>Current smoker                   | 60<br>28          | ≥65<br>≥65                                                 | Adjusted:<br>1.88 (1.15–3.06)<br>2.34 (1.22–4.50)                                                                                                                      |
| Jackson 2009 [19] (USA)             | Population-based, nested case-control study, influenza seasons and pre-influenza periods of 2000/01 and 2002/03 (1,173 cases) | Clinical and X-ray              | Former smoker<br>Current smoker               | 57<br>9           | ≥65<br>65–74<br>75–84<br>85<br>≥65<br>65–74<br>75–84<br>85 | Multivariate:<br>1.3 (1.1–1.5)<br>1.3 (1.0–1.6)<br>1.4 (1.1–1.7)<br>1.6 (1.1–2.3)<br>Multivariate:<br>1.8 (1.4–2.3)<br>1.6 (1.1–2.5)<br>2.3 (1.5–3.7)<br>2.4 (1.1–5.1) |

| Reference (country)             | Methodology (N)                                                                                  | Disease definition                                                                 | Underlying definition                               | Number of smokers | Population age (years) (other predisposing condition) | Fold risk elevation OR (95% CI)*                                                                      |
|---------------------------------|--------------------------------------------------------------------------------------------------|------------------------------------------------------------------------------------|-----------------------------------------------------|-------------------|-------------------------------------------------------|-------------------------------------------------------------------------------------------------------|
| Juthani-Mehta 2013 [15] (USA)   | Case-control study using a subset of a prospective cohort, 1997-2008 (193 cases)                 | Hospitalized pneumonia: ICD-9 criteria, clinical and chest X-ray                   | Current smoker<br>Former smoker<br>Pack-yrs smoking | 18<br>103         | 70-79<br>70-79<br>70-79                               | Bivariate HR: 1.95 (1.16-3.26)<br>Bivariate HR: 1.68 (1.24-2.27)<br>Multivariate HR: 1.01 (1.00-1.01) |
| Mullerova 2012 [21] (UK)        | Nested case-control population-based on retrospective COPD cohort, 1996-2005 (1,469 cases)       | Diagnosis code                                                                     | Former smoker<br>Current smoker                     |                   | ≥45 (COPD)<br>≥45 (COPD)                              | Multivariate: 1.04 (0.90-1.2)<br>0.99 (0.86-1.14)                                                     |
| Obiora 2013 [22] (UK)           | Nested case-control study using primary care patient database, 2001-2002 (4964 cases)            | Medical records                                                                    | Current smoker                                      | 1,219             | Adults                                                | 1.69 (1.57-1.83)                                                                                      |
| Rodriguez 2009 [23] (Sweden)    | Nested case-control study using the Health Improvement Network database, 2000-2005 (7,297 cases) | Pneumonia diagnosis code, validated by manual review of medical records            | Smoker<br>Ex-smoker                                 | 3,161<br>1,839    | 20-79<br>20-79                                        | RR: 1.52 (1.40-1.65)<br>RR: 1.14 (1.04-1.25)                                                          |
| Shea 2014 [7] (USA)             | Retrospective cohort study using three healthcare claims repositories, 2006-2010                 | Diagnosis/drug codes                                                               | Smoker                                              |                   | 18-49<br>50-64<br>≥65                                 | Rate ratio: 3.3 (3.2-3.3)<br>Rate ratio: 4.0 (3.9-4.0)<br>Rate ratio: 3.6 (3.5-3.6)                   |
| Vila-Corcoles 2009 [24] (Spain) | Population-based cohort study in community-dwelling individuals, 2002-2005 (473 cases)           | Clinical, X-ray, microbiological and diagnosis code in hospital discharge database | Smoking                                             | 58                | ≥65                                                   | Multivariate HR: 1.12 (0.83-1.49)                                                                     |
| <b>Pneumococcal pneumonia</b>   |                                                                                                  |                                                                                    |                                                     |                   |                                                       |                                                                                                       |
| Shea 2014 [7] (USA)             | Retrospective cohort study using three healthcare claims repositories, 2006-2010                 | Diagnosis/drug codes                                                               | Smoker                                              |                   | 18-49<br>50-64<br>≥65                                 | Rate ratio: 3.0 (2.7-3.3)<br>Rate ratio: 4.4 (4.1-4.6)<br>Rate ratio: 3.9 (3.6-4.3)                   |

| Reference (country)                  | Methodology (N)                                                                                                                                        | Disease definition                                        | Underlying definition                                               | Number of smokers | Population age (years) (other predisposing condition) | Fold risk elevation OR (95% CI)*                                                    |
|--------------------------------------|--------------------------------------------------------------------------------------------------------------------------------------------------------|-----------------------------------------------------------|---------------------------------------------------------------------|-------------------|-------------------------------------------------------|-------------------------------------------------------------------------------------|
| <b>Invasive pneumococcal disease</b> |                                                                                                                                                        |                                                           |                                                                     |                   |                                                       |                                                                                     |
| Flory 2009 [25] (USA)                | Population-based surveillance study, 2002–2004 (609 cases)                                                                                             | Bacteremia pneumococcal pneumonia: microbiological        | Current smoker                                                      | 207               | ≥18                                                   | Adjusted: 2.2 (1.7–3.0)                                                             |
| Jacups 2011 [30] (Australia)         | Prospective surveillance cohort study, 1987–1998 (cohort 1); retrospective chart review cohort study, 1999–2008 (cohort 2) (205 cases for cohorts 1+2) | Bacteremic pneumococcal pneumonia: X-ray, microbiological | Smoker                                                              | 146               | ≥14                                                   | Multivariate adjusted RR: 2.7 (1.9–3.7)                                             |
| Shea 2014 [7] (USA)                  | Retrospective cohort study using three healthcare claims repositories, 2006–2010                                                                       | Diagnosis/drug codes                                      | Smoker                                                              |                   | 18–49<br>50–64<br>≥65                                 | Rate ratio: 3.6 (2.8–4.5)<br>Rate ratio: 4.3 (3.7–5.0)<br>Rate ratio: 4.2 (3.2–5.5) |
| Watt 2007 [26] (USA)                 | Case-control prospective study, population-based active laboratory surveillance, 1999–2002 (118 cases)                                                 | Positive culture from a normally sterile fluid            | Self-reported:<br>Former smoker<br>Current smoker<br>Passive smoker | 21<br>11<br>29    | ≥18<br>≥18<br>≥18                                     | Univariate: 1.5 (0.8–2.8)<br>Univariate: 1.1 (0.5–2.3)<br>Univariate: 0.7 (0.4–1.1) |

Grey rows represent cohort studies; white rows represent case-control studies. \*Unless otherwise specified.

CI, confidence interval; HR, hazard ratio; ICD, International Classification of Diseases; OR, odds ratio, RR: relative risk.

**Supplemental table S3 Risk of community-acquired pneumonia or pneumococcal disease in patients with diabetes mellitus**

| Reference (country)                 | Methodology (N)                                                                                                                                                          | Disease definition                                               | Underlying definition     | Number of cases with comorbidity | Population age (years) (other predisposing condition) | Fold risk elevation OR (95% CI)*                                                                                                  |
|-------------------------------------|--------------------------------------------------------------------------------------------------------------------------------------------------------------------------|------------------------------------------------------------------|---------------------------|----------------------------------|-------------------------------------------------------|-----------------------------------------------------------------------------------------------------------------------------------|
| <b>Community-acquired pneumonia</b> |                                                                                                                                                                          |                                                                  |                           |                                  |                                                       |                                                                                                                                   |
| Almirall 2008 [16] (Spain)          | Population-based, case-control study, Nov 1999–Nov 2000 (1,336 cases)                                                                                                    | Antibiotics, clinical and X-ray                                  | Treated diabetes mellitus | 135                              | >14                                                   | Univariate: 1.43 (1.11–1.92)                                                                                                      |
| Ehrlich 2010 [31] (USA)             | Retrospective, longitudinal cohort study using Kaiser Permanente Medical Care Program database, including subcohort of survey responders (70,645 patients with diabetes) | ICD-9 diagnosis code                                             | Diabetes                  |                                  | ≥18                                                   | Multivariate HR: 1.92 (1.84–1.99)                                                                                                 |
| Jackson 2009 [19] (USA)             | Population-based, nested case-control study, influenza seasons and pre-influenza periods of 2000/01 and 2002/03 (1,173 cases)                                            | Clinical and X-ray                                               | Diabetes without insulin  | 6                                | ≥65                                                   | Univariate, adjusted: 1.0 (0.8–1.3)                                                                                               |
|                                     |                                                                                                                                                                          |                                                                  | Diabetes with insulin     | 11                               | ≥65                                                   | 1.3 (1.0–1.5)                                                                                                                     |
| Juthani-Mehta 2013 [15] (USA)       | Case-control study using a subset of a prospective cohort, 1997–2008 (193 cases)                                                                                         | Hospitalized pneumonia: ICD-9 criteria, clinical and chest X-ray | Diabetes mellitus         | 56                               | 70–79                                                 | Bivariate HR: 1.05 (0.77–1.43)                                                                                                    |
| Kornum 2008 [32] (Denmark)          | Population-based, case-control study, 1997–2005 (34,239 cases)                                                                                                           | Hospitalized pneumonia: ICD discharge codes                      | Diabetes (overall)        | 4,489                            | ≥15<br>15–39<br>40–64<br>65–79<br>≥80                 | Adjusted:<br>RR: 1.26 (1.21–1.31)<br>RR: 3.21 (2.51–4.12)<br>RR: 1.65 (1.51–1.81)<br>RR: 1.22 (1.15–1.29)<br>RR: 1.11 (1.05–1.18) |
|                                     |                                                                                                                                                                          |                                                                  | Type 1 diabetes           | 101                              | ≥15<br>15–39<br>40–64                                 | RR: 4.43 (3.40–5.77)<br>RR: 5.15 (3.61–7.36)<br>RR: 3.43 (2.14–5.50)                                                              |

| Reference (country)          | Methodology (N)                                                                                                                                                                                                                                            | Disease definition                                                      | Underlying definition | Number of cases with comorbidity | Population age (years) (other predisposing condition) | Fold risk elevation OR (95% CI)*   |                              |
|------------------------------|------------------------------------------------------------------------------------------------------------------------------------------------------------------------------------------------------------------------------------------------------------|-------------------------------------------------------------------------|-----------------------|----------------------------------|-------------------------------------------------------|------------------------------------|------------------------------|
| Kornum 2008 (cont'd)         |                                                                                                                                                                                                                                                            |                                                                         | Type 2 diabetes       | 4,388                            | ≥15                                                   | RR: 1.23 (1.19–1.28)               |                              |
|                              |                                                                                                                                                                                                                                                            |                                                                         |                       |                                  | 15–39                                                 | RR: 2.15 (1.51–3.06)               |                              |
|                              |                                                                                                                                                                                                                                                            |                                                                         |                       |                                  | 40–64                                                 | RR: 1.62 (1.47–1.77)               |                              |
|                              |                                                                                                                                                                                                                                                            |                                                                         |                       |                                  | 65–79                                                 | RR: 1.22 (1.15–1.29)               |                              |
|                              |                                                                                                                                                                                                                                                            |                                                                         |                       |                                  | ≥80                                                   | RR: 1.11 (1.05–1.18)               |                              |
| Mullerova 2012 [21] (UK)     | Nested case-control population-based on retrospective COPD cohort, 1996–2005 (1,469 cases)                                                                                                                                                                 | Diagnosis code                                                          | Diabetes              |                                  | ≥15                                                   | Diabetes (types 1 & 2)             |                              |
|                              |                                                                                                                                                                                                                                                            |                                                                         |                       |                                  |                                                       | A1C level <7%                      | RR: 1.22 (1.14–1.30)         |
|                              |                                                                                                                                                                                                                                                            |                                                                         |                       |                                  |                                                       | A1C level ≥9%                      | RR: 1.60 (1.44–1.76)         |
|                              |                                                                                                                                                                                                                                                            |                                                                         |                       |                                  |                                                       | Duration ≥10 years                 | RR: 1.37 (1.28–1.47)         |
| Rodriguez 2009 [23] (Sweden) | Nested case-control study using the Health Improvement Network database, 2000–2005 (7,297 cases)                                                                                                                                                           | Pneumonia diagnosis code, validated by manual review of medical records | Diabetes              | 792                              | 20–79                                                 | RR: 1.28 (1.13–1.44)               |                              |
| Seminog 2013 [14] (UK)       | Retrospective cohort study of individuals hospitalized with diabetes mellitus, using two data sets of linked hospital admission and death records (Oxford Record Linkage Study [1963–1998] and all-England linked hospital episode statistics [1999–2011]) | Lobar pneumonia: ICD diagnosis codes                                    | Diabetes mellitus     | 2007–2011 (England):             | 2,287                                                 | <60                                | Rate ratio: 2.34 (2.23–2.47) |
|                              |                                                                                                                                                                                                                                                            |                                                                         |                       |                                  | 15,648                                                | ≥60                                | Rate ratio: 1.61 (1.58–1.65) |
| Shea 2014 [7] (USA)          | Retrospective cohort study using three healthcare claims repositories, 2006–2010                                                                                                                                                                           | Diagnosis/drug codes                                                    | Diabetes              |                                  | 18–49                                                 | Rate ratio: 3.1 (3.1–3.2)          |                              |
|                              |                                                                                                                                                                                                                                                            |                                                                         |                       |                                  | 50–64                                                 | Rate ratio: 3.0 (3.0–3.0)          |                              |
|                              |                                                                                                                                                                                                                                                            |                                                                         |                       |                                  | ≥65                                                   | Rate ratio: 2.8 (2.8–2.8)          |                              |
| Skull 2009 [33] (Australia)  | Case-cohort study (1,952 cases)                                                                                                                                                                                                                            | Hospitalized community-acquired pneumonia: diagnosis code, X-ray        | Diabetes              |                                  | ≥65                                                   | Multivariate: RR: 1.22 (1.05–1.42) |                              |



| Reference (country)                  | Methodology (N)                                                                                                                                                                                                                                            | Disease definition                                                                 | Underlying definition | Number of cases with comorbidity | Population age (years) (other predisposing condition) | Fold risk elevation OR (95% CI)*          |
|--------------------------------------|------------------------------------------------------------------------------------------------------------------------------------------------------------------------------------------------------------------------------------------------------------|------------------------------------------------------------------------------------|-----------------------|----------------------------------|-------------------------------------------------------|-------------------------------------------|
| Vila-Corcoles 2009 [24] (Spain)      | Population-based cohort study in community-dwelling individuals, 2002–2005 (473 cases)                                                                                                                                                                     | Clinical, X-ray, microbiological and diagnosis code in hospital discharge database | Diabetes mellitus     | 120                              | ≥65                                                   | Multivariate HR: 1.04 (0.85–1.29)         |
| Vinogradova 2009 [8] (UK)            | Nested case-control study in 443 general practices in the UK 1996–2005 (17,172 cases)                                                                                                                                                                      | Incident diagnosis code                                                            | Diabetes              | 1,344                            | All ages                                              | Adjusted: 1.36 (1.27–1.47)                |
|                                      |                                                                                                                                                                                                                                                            |                                                                                    |                       | 264                              | 5–64                                                  | Adjusted: 1.74 (1.49–2.02)                |
| <b>Pneumococcal pneumonia</b>        |                                                                                                                                                                                                                                                            |                                                                                    |                       |                                  |                                                       |                                           |
| Jacups 2011 [30] (Australia)         | Prospective surveillance cohort study, 1987–1998 (cohort 1); retrospective chart review cohort study, 1999–2008 (cohort 2) (205 cases for cohorts 1+2)                                                                                                     | Bacteremic pneumococcal pneumonia: X-ray, microbiological                          | Diabetes              | 44                               | ≥14                                                   | Multivariate, adjusted: RR: 2.3 (1.6–3.3) |
| Seminog 2013 [14] (UK)               | Retrospective cohort study of individuals hospitalized with diabetes mellitus, using two data sets of linked hospital admission and death records (Oxford Record Linkage Study [1963–2011] and all-England linked hospital episode statistics [1999–2011]) | ICD diagnosis codes                                                                | Diabetes mellitus     | 2007–2011 (England): 82          | <60                                                   | Rate ratio: 2.03 (1.55–2.65)              |
|                                      |                                                                                                                                                                                                                                                            |                                                                                    |                       | 327                              | ≥60                                                   | Rate ratio: 1.54 (1.32–1.79)              |
| Shea 2014 [7] (USA)                  | Retrospective cohort study using three healthcare claims repositories, 2006–2010                                                                                                                                                                           | Diagnosis/drug codes                                                               | Diabetes              |                                  | 18–49                                                 | Rate ratio: 3.1 (2.9–3.3)                 |
|                                      |                                                                                                                                                                                                                                                            |                                                                                    |                       |                                  | 50–64                                                 | Rate ratio: 3.0 (2.8–3.1)                 |
|                                      |                                                                                                                                                                                                                                                            |                                                                                    |                       |                                  | ≥65                                                   | Rate ratio: 2.8 (2.7–2.9)                 |
| <b>Invasive pneumococcal disease</b> |                                                                                                                                                                                                                                                            |                                                                                    |                       |                                  |                                                       |                                           |
| Flory 2009 [25] (USA)                | Population-based surveillance study, 2002–2004 (609 cases)                                                                                                                                                                                                 | Bacteremia pneumococcal pneumonia: microbiological                                 | Diabetes mellitus     | 65                               | ≥18                                                   | Adjusted: 1.4 (1.0–2.0)                   |

| Reference (country)          | Methodology (N)                                                                                                                                                                                                                                                                            | Disease definition                                          | Underlying definition                      | Number of cases with comorbidity | Population age (years) (other predisposing condition) | Fold risk elevation OR (95% CI)*                                                                  |
|------------------------------|--------------------------------------------------------------------------------------------------------------------------------------------------------------------------------------------------------------------------------------------------------------------------------------------|-------------------------------------------------------------|--------------------------------------------|----------------------------------|-------------------------------------------------------|---------------------------------------------------------------------------------------------------|
| Inghammar 2013 [13] (Sweden) | Nested case-control study, 1987–2008 (4084 cases)                                                                                                                                                                                                                                          | Positive culture from a normally sterile fluid              | Diabetes mellitus                          | 298                              | ≥18                                                   | Multivariate: 1.7 (1.5–1.9)                                                                       |
| Seminog 2013 [14] (UK)       | Retrospective cohort study of individuals hospitalized with diabetes mellitus, using two data sets of linked hospital admission and death records (Oxford Record Linkage Study [1963–1998] and all-England linked hospital episode statistics [1999–2011])                                 | Pneumococcal septicemia and meningitis: ICD diagnosis codes | Diabetes mellitus                          | 2007–2011 (England):<br>33<br>93 | <60<br>≥60                                            | Rate ratio:<br>2.06 (1.33–3.14)<br>Rate ratio:<br>1.50 (1.12–2.01)                                |
| Shea 2014 [7] (USA)          | Retrospective cohort study using three healthcare claims repositories, 2006–2010                                                                                                                                                                                                           | Diagnosis/drug codes                                        | Diabetes                                   |                                  | 18–49<br>50–64<br>≥65                                 | Rate ratio:<br>3.0 (2.4–3.7)<br>Rate ratio:<br>2.6 (2.3–2.9)<br>Rate ratio:<br>2.5 (2.2–2.9)      |
| van Hoek 2012 [12] (UK)      | Comparison of prevalence of clinical risk factors in the general population with that in hospitalized patients with invasive pneumococcal disease, 2002–2009 (22,298 cases)                                                                                                                | ICD diagnosis code; microbiological                         | Diabetes                                   | 703<br>1,495                     | 16–64<br>≥65                                          | 4.6 (4.2–5.0)<br>2.3 (2.2–2.5)                                                                    |
| Watt 2007 (USA) [26]         | Case-control prospective study, population-based active laboratory surveillance, 1999–2002 (118 cases)                                                                                                                                                                                     | Positive culture from a normally sterile fluid              | Diabetes mellitus                          | 37                               | ≥18<br>≥18<br>≥18 (chronic renal failure)             | Univariate:<br>1.7 (1.0–2.9)<br>Multivariate:<br>1.5 (0.8–2.6)<br>Multivariate:<br>5.8 (2.3–14.8) |
| Wotton 2012 [34] (UK)        | Retrospective cohort study of individuals hospitalized with immune-mediated diseases, using two data sets of linked hospital admission and death records (Oxford Record Linkage Study [ORLS1: 1963–1998; ORLS2: 1999–2008] and all-England linked hospital episode statistics [1999–2008]) | ICD diagnostic codes                                        | Diabetes mellitus (since <30 years of age) |                                  | All ages (ORLS2)<br>All ages (England)                | Rate ratio:<br>3.30 (2.07–5.07)<br>Rate ratio:<br>3.90 (3.55–4.28)                                |

Grey rows represent cohort studies; white rows represent case-control studies. \*Unless otherwise specified.

A1C, glycated hemoglobin; CI, confidence interval; ChI, Charlson index; HR, hazard ratio; ICD, International Classification of Diseases; OR, odds ratio, RR: relative risk.

**Supplemental table S4 Risk of community-acquired pneumonia or pneumococcal disease in patients with chronic heart disease**

| Reference (country)                 | Methodology                                                                                                                   | Disease definition                                               | Underlying definition   | Number of exposed cases | Population age (years) (other predisposing condition) | Fold risk elevation OR (95% CI)*  |
|-------------------------------------|-------------------------------------------------------------------------------------------------------------------------------|------------------------------------------------------------------|-------------------------|-------------------------|-------------------------------------------------------|-----------------------------------|
| <b>Community-acquired pneumonia</b> |                                                                                                                               |                                                                  |                         |                         |                                                       |                                   |
| Almirall 2008 [16] (Spain)          | Population-based, case-control study, Nov 1999–Nov 2000 (1,336 cases)                                                         | Antibiotics, clinical and X-ray                                  | CHF                     | 114                     | >14                                                   | Univariate:<br>1.81 (1.33–2.49)   |
|                                     |                                                                                                                               |                                                                  | Heart valve disease     | 59                      | >14                                                   | Univariate:<br>1.70 (1.11–2.61)   |
|                                     |                                                                                                                               |                                                                  | Coronary artery disease | 80                      | >14                                                   | Univariate:<br>1.05 (0.76–1.45)   |
| Gau 2010 [18] (USA)                 | Retrospective case-control study, 2004–2006 (194 cases)                                                                       | X-ray                                                            | CHF                     | 63                      | ≥65                                                   | Adjusted:<br>1.60 (1.04–2.46)     |
|                                     |                                                                                                                               |                                                                  | Coronary artery disease | 77                      | ≥65                                                   | Adjusted:<br>1.40 (0.94–2.08)     |
| Jackson 2009 [19] (USA)             | Population-based, nested case-control study, influenza seasons and pre-influenza periods of 2000/01 and 2002/03 (1,173 cases) | Clinical and X-ray                                               | Non-CHF heart disease   | 32                      | ≥65                                                   | Multivariate:<br>1.2 (1.1–1.4)    |
|                                     |                                                                                                                               |                                                                  |                         |                         | 65–74                                                 | 1.2 (1.0–1.6)                     |
|                                     |                                                                                                                               |                                                                  |                         |                         | 75–84                                                 | 1.1 (0.9–1.4)                     |
|                                     |                                                                                                                               |                                                                  | Mild CHF                | 10                      | 85                                                    | 1.5 (1.0–2.3)                     |
|                                     |                                                                                                                               |                                                                  |                         |                         | ≥65                                                   | 1.9 (1.5–2.5)                     |
|                                     |                                                                                                                               |                                                                  |                         |                         | 65–74                                                 | 2.3 (1.4–4.0)                     |
| Severe CHF                          | 8                                                                                                                             | 75–84                                                            | 3.2 (2.2–4.8)           |                         |                                                       |                                   |
|                                     |                                                                                                                               | 85                                                               | 1.1 (0.6–1.8)           |                         |                                                       |                                   |
|                                     |                                                                                                                               | ≥65                                                              | 3.3 (2.3–4.7)           |                         |                                                       |                                   |
| Juthani-Mehta 2013 [15] (USA)       | Case-control study using a subset of a prospective cohort, 1997–2008 (193 cases)                                              | Hospitalized pneumonia: ICD-9 criteria, clinical and chest X-ray | Coronary heart disease  | 70                      | 70–79                                                 | Bivariate HR:<br>1.25 (0.93–1.68) |
|                                     |                                                                                                                               |                                                                  |                         |                         | 65–74                                                 | 2.8 (1.5–5.4)                     |
|                                     |                                                                                                                               |                                                                  |                         |                         | 75–84                                                 | 3.5 (2.1–5.8)                     |
|                                     |                                                                                                                               |                                                                  |                         |                         | 85                                                    | 2.7 (1.1–6.6)                     |

| Reference (country)          | Methodology                                                                                                                                      | Disease definition                                                                 | Underlying definition       | Number of exposed cases | Population age (years) (other predisposing condition) | Fold risk elevation OR (95% CI)* |
|------------------------------|--------------------------------------------------------------------------------------------------------------------------------------------------|------------------------------------------------------------------------------------|-----------------------------|-------------------------|-------------------------------------------------------|----------------------------------|
| Mor 2013 [10] (Denmark)      | Population-based case-control study using healthcare databases in northern Denmark, 1994–2008 (67,162 cases)                                     | Hospitalized pneumonia (including hospital-acquired pneumonia): ICD diagnosis code | Overall CHF                 | 12,339                  | ≥15                                                   | Adjusted: 1.81 (1.76–1.86)       |
|                              |                                                                                                                                                  |                                                                                    | Cardio-myopathy             | 371                     | ≥15                                                   | 2.05 (1.80–2.33)                 |
|                              |                                                                                                                                                  |                                                                                    | Heart valve disease         | 703                     | ≥15                                                   | 2.19 (2.00–2.40)                 |
|                              |                                                                                                                                                  |                                                                                    | Acute myocardial infarction | 2,704                   | ≥15                                                   | 1.69 (1.59–1.80)                 |
|                              |                                                                                                                                                  |                                                                                    | Atrial fibrillation         | 5,713                   | ≥15                                                   | 1.72 (1.66–1.78)                 |
|                              |                                                                                                                                                  |                                                                                    | Others                      | 2,848                   | ≥15                                                   | 1.99 (1.89–2.09)                 |
| Mullerova 2012 [21] (UK)     | Nested case-control population-based on retrospective COPD cohort, 1996–2005 (1,469 cases)                                                       | Diagnosis code                                                                     | Myocardial infarction       |                         | ≥45 (COPD)                                            | Multivariate: 1.0 (0.85–1.19)    |
|                              |                                                                                                                                                  |                                                                                    | CHF                         |                         | ≥45 (COPD)                                            | 1.37 (1.20–1.57)                 |
| Nyboe 2014 [11] (Denmark)    | Nationwide cohort study in adults with closed versus unclosed atrial septal defect using Danish National Patient Registry, 1997–2009 (240 cases) | Diagnosis code                                                                     | Atrial septal defect:       |                         |                                                       | Adjusted HR:                     |
|                              |                                                                                                                                                  |                                                                                    | Closed                      | 161                     | ≥18                                                   | 2.8 (2.3–3.5)                    |
|                              |                                                                                                                                                  |                                                                                    | Unclosed                    | 79                      | ≥18                                                   | 3.1 (2.4–4.0)                    |
| Obiora 2013 [22] (UK)        | Nested case-control study using primary care patient database, 2001–2002 (4,964 cases)                                                           | Medical records                                                                    | Myocardial infarction       | 630                     | Adults                                                | 1.36 (1.23–1.50)                 |
| Rodriguez 2009 [23] (Sweden) | Nested case-control study using the Health Improvement Network database, 2000–2005 (7,297 cases)                                                 | Pneumonia diagnosis code, validated by manual review of medical records            | Ischemic heart disease      | 1,244                   | 20–79                                                 | RR: 1.28 (1.16–1.42)             |
|                              |                                                                                                                                                  |                                                                                    | Myocardial infarction       | 512                     | 20–79                                                 | RR: 1.42 (1.22–1.65)             |
|                              |                                                                                                                                                  |                                                                                    | CHF                         | 533                     | 20–79                                                 | RR: 2.63 (2.21–3.14)             |
| Shea 2014 [7] (USA)          | Retrospective cohort study using three healthcare claims repositories, 2006–2010                                                                 | Diagnosis/drug codes                                                               | Chronic heart disease       |                         | 18–49                                                 | Rate ratio: 4.9 (4.9–5.0)        |
|                              |                                                                                                                                                  |                                                                                    |                             |                         | 50–64                                                 | Rate ratio: 4.3 (4.2–4.3)        |
|                              |                                                                                                                                                  |                                                                                    |                             |                         | ≥65                                                   | Rate ratio: 3.8 (3.8–3.8)        |

| Reference (country)                  | Methodology                                                                                                                                                                 | Disease definition                                                                 | Underlying definition | Number of exposed cases | Population age (years) (other predisposing condition) | Fold risk elevation OR (95% CI)*                                                    |
|--------------------------------------|-----------------------------------------------------------------------------------------------------------------------------------------------------------------------------|------------------------------------------------------------------------------------|-----------------------|-------------------------|-------------------------------------------------------|-------------------------------------------------------------------------------------|
| Vila-Corcoles 2009 [24] (Spain)      | Population-based cohort study in community-dwelling individuals, 2002–2005 (473 cases)                                                                                      | Clinical, X-ray, microbiological and diagnosis code in hospital discharge database | Chronic heart disease | 99                      | ≥65                                                   | Multivariate HR: 1.46 (1.16–1.84)                                                   |
| Vinogradova 2009 [8] (UK)            | Nested case-control study in 443 general practices in the UK 1996–2005 (17,172 cases)                                                                                       | Incident diagnostic code                                                           | Chronic heart disease | 3,239<br>321            | All ages<br>5–64                                      | Adjusted: 1.63 (1.54–1.72)<br>Adjusted: 2.05 (1.78–2.37)                            |
| <b>Pneumococcal pneumonia</b>        |                                                                                                                                                                             |                                                                                    |                       |                         |                                                       |                                                                                     |
| Shea 2014 [7] (USA)                  | Retrospective cohort study using three healthcare claims repositories, 2006–2010                                                                                            | Diagnosis/drug codes                                                               | Chronic heart disease |                         | 18–49<br>50–64<br>≥65                                 | Rate ratio: 5.1 (4.6–5.5)<br>Rate ratio: 4.2 (4.0–4.4)<br>Rate ratio: 3.8 (3.6–3.9) |
| <b>Invasive pneumococcal disease</b> |                                                                                                                                                                             |                                                                                    |                       |                         |                                                       |                                                                                     |
| Inghammar 2013 [13] (Sweden)         | Nested case-control study, 1987–2008 (4,084 cases)                                                                                                                          | Positive culture from a normally sterile fluid                                     | CHF                   | 333                     | ≥18                                                   | Multivariate: 1.7 (1.4–1.9)                                                         |
| Shea 2014 [7] (USA)                  | Retrospective cohort study using three healthcare claims repositories, 2006–2010                                                                                            | Diagnosis/drug codes                                                               | Chronic heart disease |                         | 18–49<br>50–64<br>≥65                                 | Rate ratio: 3.9 (3.0–5.1)<br>Rate ratio: 2.9 (2.6–3.3)<br>Rate ratio: 3.2 (2.8–3.6) |
| van Hoek 2012 [12] (UK)              | Comparison of prevalence of clinical risk factors in the general population with that in hospitalized patients with invasive pneumococcal disease, 2002–2009 (22,298 cases) | ICD diagnosis code; microbiological                                                | Chronic heart disease | 1,213<br>4,841          | 16–64<br>≥65                                          | 6.9 (6.5–7.4)<br>3.0 (2.9–3.1)                                                      |

| Reference (country)  | Methodology                                                                                            | Disease definition                             | Underlying definition            | Number of exposed cases | Population age (years) (other predisposing condition) | Fold risk elevation OR (95% CI)* |
|----------------------|--------------------------------------------------------------------------------------------------------|------------------------------------------------|----------------------------------|-------------------------|-------------------------------------------------------|----------------------------------|
| Watt 2007 [26] (USA) | Case-control prospective study, population-based active laboratory surveillance, 1999–2002 (118 cases) | Positive culture from a normally sterile fluid | CHF                              | 26                      | ≥18                                                   | Univariate: 9.9 (4.3–23.0)       |
|                      |                                                                                                        |                                                | History of myocardial infarction | 7                       | ≥18                                                   | Univariate: 2.6 (0.9–7.5)        |
|                      |                                                                                                        |                                                | Coronary artery disease          | 15                      | ≥18                                                   | Univariate: 2.9 (1.3–6.2)        |

Grey rows represent cohort studies; white rows represent case-control studies. \*Unless otherwise specified.

CI, confidence interval; HR, hazard ratio; CHF, congestive heart failure; ICD, International Classification of Diseases; OR, odds ratio, RR: relative risk.
